# Supplementary material for: Triethylene glycol, an active component of Ashwagandha (Withania somnifera) leaves, is responsible for sleep induction
Source: PubMed Central journal article supplement (PMC5313221; doi:10.1371/journal.pone.0172508), 2017-02-16
Supplement: pone.0172508.s001.pdf [file pone.0172508.s001.pdf]

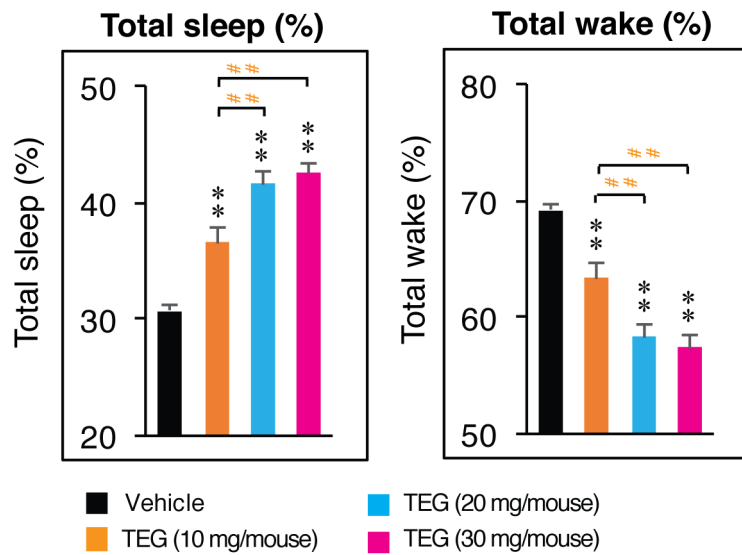

**S1 Fig. TEG decreased total wake percentage and increased total sleep percentage.**

Graph shows changes total wake (A) and total sleep (B) percentage during 12 h dark phase after vehicle (black bar) and various doses of TEG (color bars) administration in mice. Data presented as mean  $\pm$  SEM; n=6; \* $p \leq 0.05$ , \*\* $p \leq 0.01$  vs vehicle, and ## $p \leq 0.01$  vs TEG (10 mg/head), by one-way ANOVA followed by least square difference (LSD) post-hoc test.
