# Supplementary material for: Triethylene glycol, an active component of Ashwagandha (Withania somnifera) leaves, is responsible for sleep induction
Source: PubMed Central journal article supplement (PMC5313221; doi:10.1371/journal.pone.0172508), 2017-02-16
Supplement: pone.0172508.s002.pdf [file pone.0172508.s002.pdf]

**Comparison of sleep-wake after doxipin (positive control) and TEG administration**

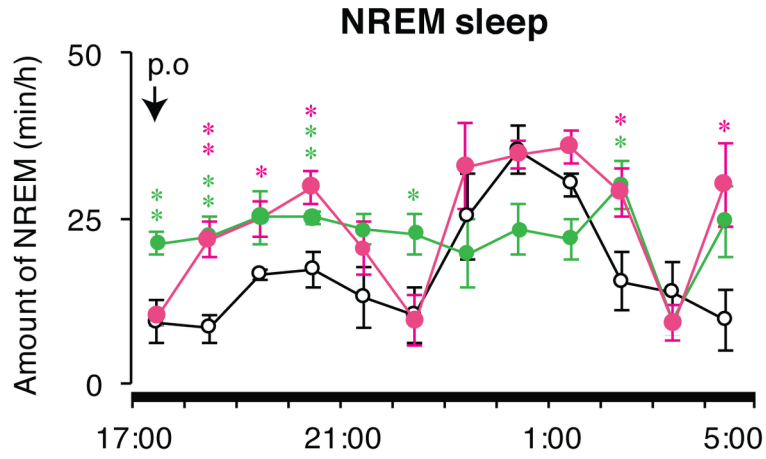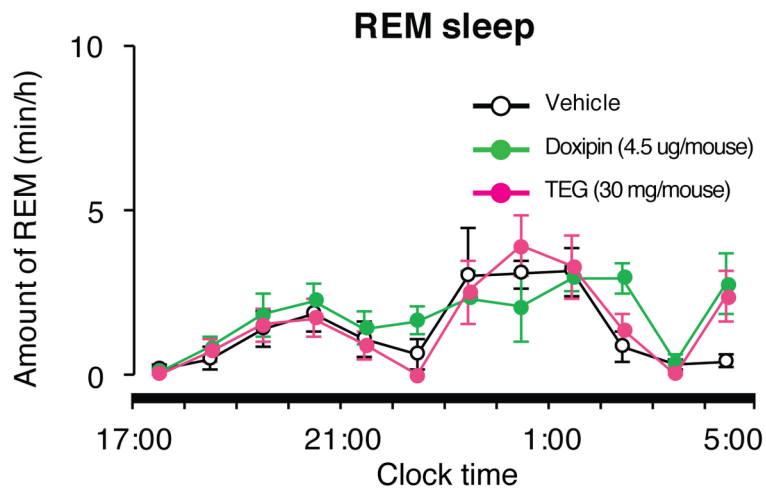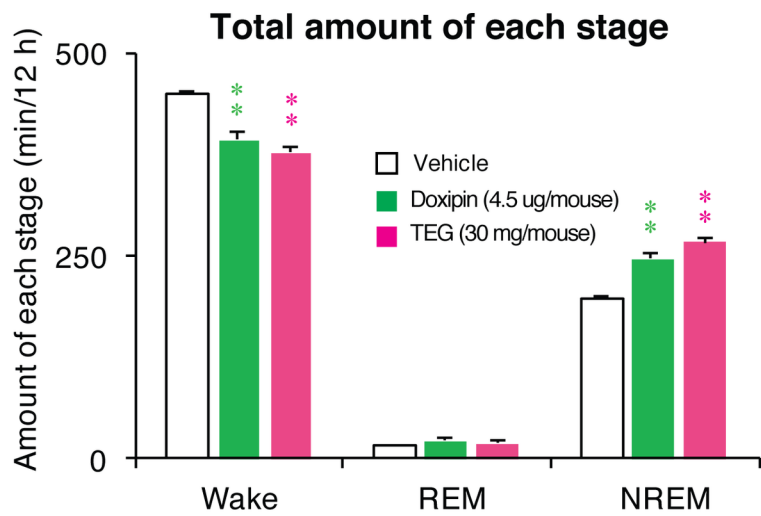

**S2 Fig. TEG induced NREM sleep was comparable to positive control (doxepin).** Graph shows time course changes in NREM sleep after TEG (magenta line) and doxepin (green line) administration in mice. Data presented as mean  $\pm$  SEM; n=6; \*p $\leq$ 0.05, \*\*p $\leq$ 0.01 vs vehicle by one-way ANOVA followed by least square difference (LSD) post-hoc test.
