# Supplementary material for: Triethylene glycol, an active component of Ashwagandha (Withania somnifera) leaves, is responsible for sleep induction
Source: PubMed Central journal article supplement (PMC5313221; doi:10.1371/journal.pone.0172508), 2017-02-16
Supplement: pone.0172508.s004.pdf [file pone.0172508.s004.pdf]

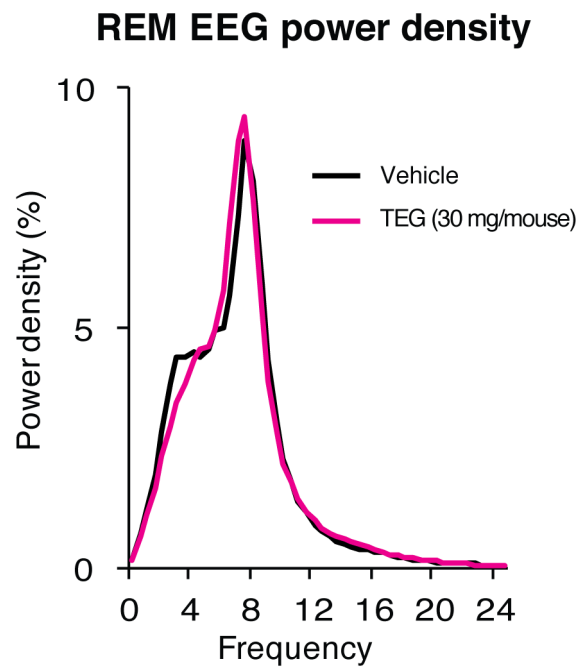

**S4 Fig. TEG induced changes in REM sleep power density.** Graph shows changes in REM sleep power density after vehicle (black line) and TEG (magenta line) administration in mice.
